# Supplementary material for: Osteogenic Potential of Dental Mesenchymal Stem Cells in Preclinical Studies: A Systematic Review Using Modified ARRIVE and CONSORT Guidelines
Source: Hindawi journal article supplement (doi:10.1155/2015/378368), 2015-01-01
Supplement: f1 [file 378368.f1.pdf]

**Supplemental Table i : Methodological characteristics of In- Vitro Studies based on the guidelines**

| Studies                       | 1 | 2 | 3 | 4 | 5 | 6 | 7 | 8 | 9 | 10 | 11 | 12 |
|-------------------------------|---|---|---|---|---|---|---|---|---|----|----|----|
| <b>SCAP</b>                   |   |   |   |   |   |   |   |   |   |    |    |    |
| Abe s et al 2008              | 1 | 2 | 2 | 1 | 0 | 2 | 0 | 0 | 0 | 1  | 0  | 1  |
| Park BW et al 2009            | 1 | 2 | 2 | 1 | 0 | 2 | 0 | 0 | 1 | 1  | 0  | 1  |
| Abe S et al 2012              | 1 | 1 | 2 | 0 | 0 | 2 | 1 | 1 | 1 | 1  | 1  | 1  |
| Wang S et al 2012             | 1 | 2 | 2 | 1 | 1 | 2 | 0 | 2 | 1 | 1  | 1  | 1  |
| Wu J et al 2012               | 1 | 2 | 2 | 1 | 1 | 2 | 0 | 2 | 1 | 1  | 1  | 1  |
| Wang L et al 2013             | 1 | 2 | 2 | 1 | 1 | 2 | 0 | 2 | 1 | 1  | 0  | 1  |
| Qu B et al [2014]             | 1 | 1 | 2 | 1 | 1 | 2 | 0 | 2 | 1 | 1  | 1  | 2  |
| <b>Dental Papilla</b>         |   |   |   |   |   |   |   |   |   |    |    |    |
| Ikeda E et al [2006]          | 1 | 0 | 2 | 1 | 0 | 2 | 0 | 1 | 0 | 1  | 0  | 1  |
| <b>Dental Follicular</b>      |   |   |   |   |   |   |   |   |   |    |    |    |
| Tsuchiya S et al[2010]        | 1 | 1 | 2 | 1 | 0 | 2 | 1 | 1 | 1 | 2  | 1  | 1  |
| Honda MJ et al 2011           | 1 | 2 | 2 | 1 | 0 | 2 | 1 | 1 | 1 | 1  | 1  | 1  |
| Viale Bouroncle S et al[2011] | 1 | 2 | 2 | 1 | 0 | 2 | 1 | 2 | 2 | 2  | 0  | 1  |
| Aonouma H et al[2012]         | 1 | 2 | 2 | 1 | 0 | 2 | 1 | 2 | 1 | 2  | 1  | 1  |
| Li C et al[2012]              | 1 | 1 | 2 | 0 | 0 | 2 | 1 | 2 | 1 | 2  | 1  | 1  |
| Park BW et al 2012            | 1 | 2 | 2 | 1 | 0 | 2 | 1 | 1 | 1 | 1  | 1  | 1  |
| Mori g et al[2012]            | 1 | 2 | 2 | 1 | 0 | 2 | 1 | 2 | 0 | 2  | 1  | 1  |
| Rezai Rad M et al[2013]       | 1 | 2 | 2 | 1 | 1 | 2 | 0 | 1 | 1 | 2  | 1  | 1  |
| Takahashi K et al[2013]       | 1 | 2 | 2 | 1 | 0 | 2 | 1 | 2 | 1 | 2  | 1  | 1  |
| Yao S et al[2013]             | 1 | 2 | 2 | 1 | 1 | 2 | 1 | 1 | 1 | 2  | 1  | 1  |
| <b>Gingival</b>               |   |   |   |   |   |   |   |   |   |    |    |    |
| Yu X et al[2013]              | 1 | 2 | 2 | 1 | 0 | 1 | 1 | 0 | 0 | 1  | 1  | 1  |
| <b>Neural Crestal Cells</b>   |   |   |   |   |   |   |   |   |   |    |    |    |
| Degistrici o et al[2010]      | 1 | 2 | 2 | 1 | 0 | 2 | 0 | 0 | 1 | 2  | 0  | 1  |
| <b>SHED</b>                   |   |   |   |   |   |   |   |   |   |    |    |    |
| Miura M et al 2003            | 1 | 2 | 1 | 0 | 0 | 2 | 1 | 1 | 1 | 1  | 1  | 1  |
| Vakhrusev IV et al[2010]      | 1 | 0 | 0 | 0 | 0 | 2 | 0 | 0 | 0 | 1  | 1  | 1  |
| Li B et al 2012               | 1 | 2 | 1 | 0 | 1 | 1 | 1 | 1 | 1 | 1  | 1  | 1  |
| Viale-Bouroncle S et al[2012] | 1 | 2 | 2 | 1 | 0 | 2 | 0 | 1 | 1 | 2  | 0  | 1  |
| Vakhrusev IV et al[2013]      | 1 | 1 | 2 | 0 | 0 | 2 | 0 | 0 | 0 | 1  | 1  | 1  |
| Karadzic L et al [2014]       | 1 | 1 | 2 | 1 | 0 | 2 | 0 | 2 | 1 | 2  | 0  | 1  |
| Yu S et al[2014]              | 1 | 2 | 2 | 1 | 0 | 2 | 1 | 1 | 1 | 2  | 0  | 1  |
| <b>Pulp</b>                   |   |   |   |   |   |   |   |   |   |    |    |    |
| Gronthos 2000                 | 1 | 2 | 2 | 1 | 0 | 2 | 0 | 1 | 0 | 1  | 0  | 1  |
| Laino G et al[2005]           | 1 | 1 | 2 | 0 | 1 | 2 | 0 | 0 | 1 | 1  | 1  | 1  |
| Laino G et al[2006]           | 1 | 1 | 2 | 0 | 1 | 2 | 0 | 0 | 1 | 1  | 1  | 1  |
| D'Aquino R et al [2007]       | 1 | 2 | 2 | 1 | 1 | 2 | 0 | 0 | 1 | 1  | 1  | 1  |
| Cheng PH et al[2008]          | 1 | 0 | 2 | 1 | 1 | 2 | 0 | 1 | 1 | 1  | 1  | 1  |
| Morito A et al 20091          | 1 | 1 | 1 | 1 | 1 | 2 | 1 | 1 | 1 | 1  | 1  | 1  |
| Graziano A et al[2008]        | 1 | 1 | 2 | 1 | 0 | 2 | 0 | 1 | 0 | 1  | 1  | 1  |
| Alge DL et al[2010]           | 1 | 2 | 2 | 1 | 1 | 2 | 0 | 2 | 1 | 1  | 1  | 1  |
| Han MJ et al[2011]            | 1 | 2 | 2 | 1 | 1 | 2 | 1 | 2 | 1 | 1  | 1  | 1  |
| Mangano C et al [2010]        | 1 | 2 | 2 | 0 | 1 | 2 | 0 | 2 | 0 | 1  | 1  | 1  |
| Mori G et al[2010]            | 1 | 1 | 2 | 1 | 1 | 2 | 0 | 2 | 1 | 1  | 1  | 1  |
| Spath I et al[2010]           | 1 | 2 | 2 | 1 | 0 | 2 | 0 | 2 | 0 | 1  | 1  | 1  |
| Chan B et al [2011]           | 1 | 2 | 2 | 1 | 0 | 2 | 0 | 2 | 0 | 2  | 0  | 1  |
| Galli D et al[2011]           | 1 | 1 | 2 | 0 | 1 | 2 | 0 | 2 | 1 | 1  | 1  | 1  |
| Ida et al[2011]               | 1 | 1 | 2 | 0 | 1 | 2 | 0 | 2 | 1 | 1  | 1  | 1  |
| Li JH et al[2011]             | 1 | 2 | 2 | 1 | 0 | 2 | 0 | 0 | 0 | 1  | 1  | 1  |
| Mangano C et al[2011]         | 1 | 1 | 2 | 1 | 1 | 2 | 0 | 2 | 1 | 1  | 1  | 1  |
| Struys T et al[2011]          | 1 | 2 | 2 | 1 | 1 | 2 | 0 | 2 | 0 | 1  | 0  | 1  |
| Huang XF et al[2012]          | 1 | 2 | 2 | 1 | 1 | 2 | 0 | 2 | 1 | 1  | 0  | 1  |
| Huang Y et al[2012]           | 1 | 2 | 2 | 0 | 0 | 2 | 0 | 2 | 1 | 1  | 1  | 1  |
| Khann-Jain R et al[2012]      | 1 | 2 | 2 | 1 | 1 | 2 | 0 | 2 | 1 | 1  | 1  | 1  |
| Pisciotta A et al[2012]       | 1 | 2 | 2 | 1 | 1 | 2 | 0 | 2 | 1 | 1  | 1  | 1  |
| Tasli PN et al[2013]          | 1 | 2 | 2 | 1 | 0 | 2 | 0 | 1 | 1 | 2  | 1  | 1  |

|                              |   |   |   |   |   |   |   |   |   |   |   |   |
|------------------------------|---|---|---|---|---|---|---|---|---|---|---|---|
| Palumbo C et al[2013]        | 1 | 1 | 2 | 1 | 1 | 2 | 0 | 2 | 1 | 1 | 1 | 1 |
| Zavatti M et al[2013]        | 1 | 2 | 2 | 1 | 1 | 2 | 0 | 2 | 2 | 1 | 1 | 1 |
| Akkouch A et al [2014]       | 1 | 1 | 2 | 1 | 1 | 2 | 0 | 2 | 1 | 1 | 1 | 1 |
| Amir LR et al[2014]          | 1 | 2 | 2 | 1 | 0 | 2 | 0 | 2 | 1 | 1 | 0 | 1 |
|                              |   |   |   |   |   |   |   |   |   |   |   |   |
| Guo T et al[2014]            | 1 | 2 | 2 | 1 | 0 | 2 | 0 | 2 | 1 | 1 | 1 | 1 |
| Huang CE et al[2014]         | 1 | 2 | 2 | 0 | 1 | 2 | 0 | 2 | 2 | 1 | 1 | 1 |
| Jensen J et al[2014]         | 1 | 1 | 2 | 1 | 1 | 2 | 0 | 2 | 1 | 1 | 1 | 1 |
| Ji J et al[2014]             | 1 | 2 | 2 | 0 | 0 | 2 | 2 | 2 | 1 | 1 | 1 | 1 |
| Kanafi MM et al [2014]       | 1 | 1 | 2 | 1 | 1 | 2 | 0 | 2 | 1 | 1 | 0 | 1 |
| Niu LN et al[2014]           | 1 | 1 | 2 | 1 | 0 | 2 | 0 | 2 | 1 | 1 | 1 | 1 |
| Tasli PN et al[2014]         | 1 | 2 | 2 | 1 | 0 | 2 | 0 | 1 | 1 | 1 | 0 | 1 |
| Woloszyk A et al [2014]      | 1 | 2 | 2 | 0 | 0 | 2 | 0 | 2 | 1 | 1 | 1 | 1 |
| PDLSC                        |   |   |   |   |   |   |   |   |   |   |   |   |
| Gay IC et al[2007]           | 1 | 2 | 2 | 1 | 1 | 2 | 1 | 2 | 2 | 2 | 1 | 1 |
| Trubiani O et al[2007]       | 1 | 2 | 2 | 1 | 0 | 2 | 0 | 0 | 1 | 1 | 1 | 1 |
| Zhou Y et al[ 2008]          | 1 | 2 | 1 | 0 | 1 | 2 | 1 | 2 | 2 | 2 | 1 | 1 |
| Orciani M et al[2009]        | 1 | 2 | 2 | 1 | 0 | 2 | 0 | 2 | 2 | 2 | 1 | 1 |
| He H et al[2010]             | 1 | 2 | 2 | 1 | 0 | 2 | 1 | 2 | 1 | 1 | 1 | 1 |
| Silverio KG et al [2010]     | 1 | 2 | 2 | 1 | 1 | 2 | 1 | 2 | 2 | 2 | 1 | 1 |
| Zhang B et al 2011           | 1 | 2 | 2 | 1 | 1 | 2 | 1 | 1 | 2 | 1 | 1 | 1 |
| Zhou Q et al[ 2011]          | 1 | 2 | 2 | 1 | 0 | 1 | 0 | 2 | 1 | 1 | 0 | 1 |
| Ge S et al [2012]            | 1 | 2 | 2 | 1 | 0 | 2 | 0 | 2 | 1 | 2 | 1 | 1 |
| Lee JH et al [2012]          | 1 | 2 | 1 | 0 | 1 | 1 | 1 | 2 | 1 | 1 | 1 | 1 |
| Sunnunliganon L et al[2012]  | 1 | 2 | 2 | 1 | 0 | 2 | 0 | 1 | 1 | 1 | 1 | 1 |
| Yu Y et al[2012]             | 1 | 2 | 2 | 1 | 0 | 1 | 1 | 2 | 1 | 1 | 1 | 1 |
| Zhang C et al [2012]         | 1 | 2 | 2 | 1 | 1 | 2 | 1 | 2 | 1 | 2 | 1 | 1 |
| Gao LN et al [2013]          | 1 | 2 | 2 | 1 | 1 | 2 | 1 | 2 | 1 | 2 | 1 | 1 |
| Ge S et al[2013]             | 1 | 1 | 1 | 0 | 0 | 2 | 0 | 2 | 1 | 1 | 1 | 1 |
| Houshmand B et al[2013]      | 1 | 2 | 2 | 1 | 1 | 2 | 1 | 2 | 2 | 2 | 1 | 1 |
| Kato H et al [2013]          | 1 | 2 | 2 | 1 | 1 | 2 | 1 | 2 | 2 | 2 | 1 | 1 |
| Kim SY et al[2013]           | 1 | 2 | 1 | 1 | 0 | 2 | 0 | 2 | 1 | 2 | 1 | 1 |
| Kong X et al [2013]          | 1 | 2 | 1 | 0 | 0 | 2 | 1 | 2 | 1 | 2 | 1 | 1 |
| Singhatanadgit W et al[2013] | 1 | 2 | 2 | 1 | 1 | 2 | 1 | 2 | 2 | 2 | 1 | 1 |
| Yu S et al[2013]             | 1 | 1 | 1 | 0 | 0 | 2 | 1 | 2 | 2 | 2 | 1 | 1 |
| Hakki SS et al[2014]         | 1 | 2 | 2 | 1 | 2 | 2 | 1 | 2 | 2 | 2 | 1 | 1 |
| Jung IH et al[2014]          | 1 | 1 | 2 | 1 | 1 | 2 | 1 | 2 | 1 | 2 | 1 | 1 |
| Tang R et al[2014]           | 1 | 2 | 1 | 0 | 0 | 2 | 0 | 1 | 1 | 1 | 1 | 1 |
| Ye G et al[2014]             | 1 | 1 | 1 | 0 | 1 | 2 | 0 | 2 | 1 | 1 | 1 | 1 |
| Multiple Stem Cells          |   |   |   |   |   |   |   |   |   |   |   |   |
| Koyama N et al[2009]         | 1 | 2 | 1 | 0 | 0 | 1 | 0 | 1 | 1 | 2 | 0 | 1 |
| Chadipiralla K et al[2010]   | 1 | 2 | 2 | 1 | 1 | 2 | 1 | 2 | 1 | 2 | 1 | 1 |
| Bakopoulou A[2011]           | 1 | 2 | 2 | 1 | 1 | 2 | 1 | 2 | 1 | 2 | 1 | 1 |
| Lee UL et al[2011]           | 1 | 2 | 2 | 1 | 0 | 2 | 1 | 1 | 1 | 2 | 1 | 1 |
| Atari M et al[2012]          | 1 | 2 | 2 | 1 | 1 | 2 | 1 | 2 | 1 | 2 | 1 | 1 |
| Moshaverinia A et al[2012]   | 1 | 2 | 2 | 1 | 0 | 2 | 1 | 2 | 1 | 2 | 0 | 1 |
| Yang H et al[2010]           | 1 | 2 | 2 | 1 | 1 | 2 | 1 | 2 | 1 | 2 | 1 | 1 |
| Davies OG et al [2014]       | 1 | 2 | 2 | 1 | 0 | 2 | 1 | 2 | 1 | 2 | 1 | 1 |
| Moshaverina A et al[2014]    | 1 | 2 | 2 | 1 | 0 | 2 | 2 | 2 | 2 | 2 | 1 | 1 |

[illegible]

|                                 |   |   |   |   |   |   |   |   |   |   |   |   |   |   |   |   |   |   |   |   |
|---------------------------------|---|---|---|---|---|---|---|---|---|---|---|---|---|---|---|---|---|---|---|---|
| Wang F et al[2011]              | 1 | 2 | 2 | 1 | 2 | 1 | 2 | 2 | 2 | 1 | 1 | 2 | 0 | 0 | 1 | 0 | 0 | 1 | 2 | 2 |
| Yu X et al[2013]                | 1 | 2 | 2 | 1 | 1 | 1 | 2 | 1 | 0 | 1 | 1 | 2 | 1 | 0 | 2 | 1 | 1 | 1 | 1 | 2 |
| Xu QC et al[2014]               | 1 | 1 | 1 | 0 | 2 | 1 | 2 | 1 | 1 | 1 | 1 | 2 | 2 | 0 | 1 | 1 | 0 | 1 | 1 | 2 |
| SHED                            |   |   |   |   |   |   |   |   |   |   |   |   |   |   |   |   |   |   |   |   |
| Miura M et al 2003              | 1 | 2 | 1 | 0 | 0 | 0 | 1 | 0 | 0 | 0 | 0 | 0 | 1 | 0 | 1 | 1 | 1 | 1 | 1 | 2 |
| Seo BB et al[2008]              | 1 | 2 | 1 | 0 | 1 | 1 | 1 | 1 | 0 | 1 | 0 | 1 | 0 | 0 | 2 | 0 | 0 | 1 | 1 | 0 |
| Zheng Y et al [2009]            | 1 | 2 | 2 | 1 | 2 | 0 | 1 | 2 | 2 | 1 | 0 | 1 | 1 | 0 | 1 | 1 | 1 | 0 | 1 | 2 |
| Li B et al[2012]                | 1 | 2 | 2 | 1 | 1 | 0 | 1 | 2 | 2 | 1 | 0 | 1 | 1 | 0 | 1 | 1 | 0 | 0 | 1 | 2 |
| Vakhrusev IV et al[2012]        | 1 | 1 | 1 | 0 | 0 | 0 | 1 | 0 | 0 | 0 | 0 | 1 | 0 | 0 | 0 | 0 | 0 | 0 | 1 | 2 |
| Alkaisi A et al[2013]           | 1 | 2 | 2 | 1 | 2 | 1 | 2 | 1 | 1 | 1 | 0 | 1 | 2 | 0 | 1 | 1 | 1 | 0 | 1 | 0 |
| Behina et al A [2014]           | 1 | 2 | 2 | 1 | 1 | 2 | 2 | 2 | 2 | 1 | 1 | 2 | 1 | 0 | 2 | 2 | 2 | 1 | 1 | 0 |
| Pulp                            |   |   |   |   |   |   |   |   |   |   |   |   |   |   |   |   |   |   |   |   |
| Laino G et al 2006              | 1 | 1 | 1 | 0 | 0 | 0 | 1 | 0 | 0 | 1 | 0 | 1 | 1 | 0 | 1 | 1 | 0 | 0 | 1 | 2 |
| Otaki S et al[2007]             | 1 | 1 | 2 | 0 | 0 | 0 | 2 | 1 | 0 | 0 | 0 | 0 | 0 | 0 | 0 | 1 | 0 | 1 | 1 | 1 |
| De Mendonca costa A et al[2008] | 1 | 2 | 2 | 0 | 2 | 0 | 2 | 1 | 2 | 1 | 0 | 1 | 0 | 0 | 0 | 0 | 2 | 1 | 1 | 2 |
| Zhang W et al[2008]             | 1 | 1 | 2 | 1 | 2 | 1 | 2 | 1 | 0 | 1 | 1 | 2 | 1 | 1 | 0 | 1 | 2 | 2 | 2 | 0 |
| Morito A et al [2009]           | 1 | 1 | 1 | 1 | 1 | 1 | 1 | 1 | 1 | 1 | 1 | 0 | 1 | 1 | 1 | 2 | 1 | 1 | 1 | 2 |
| Yang x ET AL[2009]              | 1 | 2 | 2 | 1 | 2 | 0 | 2 | 1 | 0 | 1 | 0 | 1 | 2 | 1 | 0 | 0 | 1 | 1 | 1 | 1 |
| Kraft DCE et al[2010]           | 1 | 2 | 2 | 1 | 2 | 1 | 2 | 2 | 0 | 0 | 2 | 2 | 0 | 0 | 0 | 2 | 0 | 1 | 1 | 2 |
| Chan B et al[2011]              | 1 | 1 | 2 | 1 | 2 | 0 | 2 | 1 | 0 | 1 | 0 | 1 | 0 | 0 | 0 | 0 | 2 | 1 | 1 | 2 |
| Ito K et al[2011]               | 1 | 1 | 2 | 1 | 2 | 1 | 2 | 0 | 1 | 1 | 1 | 1 | 2 | 0 | 0 | 1 | 0 | 1 | 1 | 2 |
| Li JH et al[2011]               | 1 | 2 | 2 | 1 | 0 | 0 | 2 | 0 | 0 | 0 | 0 | 1 | 0 | 0 | 0 | 0 | 0 | 1 | 1 | 2 |
| Liu HCE et al[2011]             | 1 | 1 | 2 | 1 | 2 | 0 | 2 | 1 | 2 | 0 | 0 | 2 | 2 | 0 | 0 | 1 | 2 | 1 | 1 | 0 |
| Pisciotta A et al[2012]         | 1 | 1 | 2 | 1 | 2 | 0 | 2 | 1 | 0 | 1 | 0 | 2 | 2 | 0 | 0 | 1 | 0 | 1 | 1 | 1 |
| Riccio M et al[2012]            | 1 | 1 | 2 | 1 | 2 | 0 | 2 | 1 | 0 | 1 | 0 | 1 | 1 | 0 | 0 | 1 | 2 | 1 | 1 | 1 |
| Annibali S et al 2013           | 1 | 2 | 2 | 1 | 0 | 0 | 1 | 0 | 1 | 1 | 1 | 1 | 1 | 0 | 1 | 1 | 0 | 0 | 1 | 2 |
| Khorsand A et al[2013]          | 1 | 1 | 2 | 1 | 0 | 1 | 2 | 2 | 1 | 0 | 1 | 2 | 2 | 0 | 0 | 1 | 0 | 1 | 1 | 0 |
| Maraldi T al [2013]             | 1 | 1 | 2 | 1 | 2 | 1 | 2 | 1 | 2 | 0 | 0 | 1 | 2 | 1 | 0 | 1 | 2 | 1 | 1 | 2 |
| Wang Y et al [2013]             | 1 | 1 | 2 | 0 | 2 | 1 | 2 | 2 | 0 | 1 | 1 | 1 | 2 | 0 | 0 | 1 | 0 | 1 | 1 | 1 |
| Annibali S et al[2014]          | 1 | 2 | 2 | 1 | 2 | 0 | 2 | 1 | 2 | 1 | 0 | 2 | 2 | 0 | 0 | 2 | 0 | 2 | 2 | 2 |
| Ling LE et al[2014]             | 1 | 1 | 2 | 1 | 2 | 0 | 2 | 1 | 0 | 1 | 0 | 2 | 0 | 0 | 0 | 2 | 0 | 1 | 1 | 0 |
| Niu LN et al [2014]             | 1 | 1 | 2 | 1 | 2 | 0 | 2 | 1 | 0 | 0 | 0 | 1 | 2 | 0 | 0 | 0 | 2 | 1 | 1 | 1 |
| PDLSC                           |   |   |   |   |   |   |   |   |   |   |   |   |   |   |   |   |   |   |   |   |
| Dogan A et al[2002]             | 1 | 2 | 2 | 1 | 2 | 1 | 2 | 0 | 0 | 1 | 1 | 2 | 1 | 0 | 2 | 0 | 1 | 1 | 1 | 0 |
| Seo BM et al[2004]              | 1 | 2 | 2 | 1 | 2 | 0 | 2 | 1 | 0 | 1 | 1 | 1 | 2 | 0 | 2 | 1 | 1 | 1 | 1 | 2 |
| Murano et al[2006]              | 1 | 2 | 2 | 1 | 1 | 0 | 2 | 0 | 0 | 0 | 0 | 1 | 1 | 0 | 1 | 1 | 0 | 1 | 1 | 0 |
| Iwata T et al[2009]             | 1 | 1 | 1 | 0 | 2 | 0 | 2 | 0 | 0 | 1 | 0 | 1 | 1 | 0 | 1 | 1 | 0 | 1 | 1 | 2 |
| Kim SH et al[2009]              | 1 | 2 | 2 | 1 | 1 | 1 | 2 | 1 | 0 | 1 | 1 | 1 | 2 | 0 | 2 | 2 | 1 | 1 | 1 | 2 |
| Ding G et al [2010]             | 1 | 2 | 2 | 1 | 2 | 1 | 2 | 2 | 1 | 1 | 1 | 2 | 2 | 0 | 1 | 1 | 1 | 1 | 1 | 2 |
| He H et al[2010]                | 1 | 2 | 2 | 1 | 1 | 1 | 2 | 0 | 0 | 1 | 1 | 1 | 2 | 0 | 1 | 1 | 1 | 1 | 1 | 2 |
| Grimm WD et al[ 2011]           | 1 | 1 | 1 | 0 | 2 | 1 | 2 | 0 | 0 | 0 | 1 | 1 | 0 | 0 | 0 | 0 | 0 | 1 | 1 | 1 |
| Lee JH et al[2012]              | 1 | 2 | 1 | 0 | 1 | 0 | 1 | 0 | 1 | 0 | 0 | 1 | 1 | 0 | 1 | 1 | 0 | 1 | 1 | 2 |
| Suaid FF et al [2012]           | 1 | 2 | 2 | 1 | 2 | 1 | 2 | 2 | 0 | 1 | 1 | 2 | 2 | 0 | 2 | 2 | 1 | 1 | 1 | 2 |
| Tour G et al[2012]              | 1 | 2 | 2 | 1 | 2 | 1 | 2 | 1 | 1 | 1 | 1 | 2 | 2 | 0 | 2 | 1 | 2 | 1 | 1 | 2 |
| Yu Y et al[2012]                | 1 | 2 | 2 | 1 | 0 | 0 | 1 | 0 | 0 | 1 | 0 | 1 | 2 | 0 | 1 | 1 | 0 | 0 | 0 | 2 |
| Gao LN et al[2013]              | 1 | 2 | 2 | 1 | 2 | 1 | 2 | 0 | 0 | 1 | 1 | 2 | 2 | 0 | 2 | 2 | 1 | 1 | 2 | 2 |
| Ge S et al[2013]                | 1 | 2 | 2 | 1 | 0 | 0 | 2 | 1 | 0 | 1 | 0 | 1 | 2 | 0 | 1 | 1 | 0 | 1 | 1 | 2 |
| Mrozik et al [2013]             | 1 | 2 | 1 | 1 | 2 | 1 | 2 | 2 | 0 | 1 | 1 | 2 | 2 | 0 | 2 | 2 | 1 | 1 | 1 | 2 |
| Yu N et al[2013]                | 1 | 2 | 2 | 1 | 2 | 1 | 2 | 1 | 0 | 1 | 1 | 2 | 2 | 0 | 2 | 1 | 2 | 1 | 1 | 2 |
| Han j et al[2014]               | 1 | 2 | 2 | 1 | 2 | 1 | 2 | 1 | 0 | 1 | 1 | 2 | 2 | 0 | 2 | 1 | 2 | 1 | 1 | 2 |
| Jung IH et al[2014]             | 1 | 1 | 2 | 1 | 2 | 1 | 2 | 2 | 0 | 1 | 0 | 1 | 2 | 0 | 1 | 2 | 1 | 1 | 1 | 2 |
| Park SY et al[2014]             | 1 | 2 | 2 | 0 | 1 | 0 | 1 | 1 | 0 | 1 | 0 | 1 | 1 | 0 | 1 | 1 | 0 | 1 | 1 | 2 |
| Yu BH et al[2014]               | 1 | 2 | 2 | 1 | 2 | 1 | 2 | 2 | 2 | 1 | 1 | 2 | 2 | 0 | 2 | 2 | 2 | 1 | 2 | 2 |
| Yu BH et al[2014]               | 1 | 2 | 2 | 1 | 1 | 1 | 2 | 1 | 0 | 1 | 1 | 2 | 2 | 0 | 1 | 1 | 1 | 1 | 1 | 2 |
| Zhao BJ [2014]                  | 1 | 2 | 2 | 1 | 1 | 1 | 2 | 1 | 0 | 1 | 0 | 1 | 1 | 0 | 2 | 1 | 0 | 1 | 1 | 0 |
| Multiple                        |   |   |   |   |   |   |   |   |   |   |   |   |   |   |   |   |   |   |   |   |
| Yamada Y et al[2011]            | 1 | 1 | 2 | 1 | 2 | 1 | 2 | 1 | 0 | 1 | 0 | 2 | 2 | 0 | 2 | 1 | 2 | 1 | 2 | 2 |
| Wang X et al[2012]              | 1 | 2 | 2 | 1 | 2 | 0 | 2 | 1 | 0 | 1 | 0 | 1 | 2 | 0 | 1 | 1 | 2 | 1 | 2 | 2 |
| Moshaverina A et al[2013]       | 1 | 2 | 2 | 1 | 1 | 1 | 2 | 1 | 1 | 1 | 1 | 1 | 2 | 1 | 2 | 1 | 1 | 1 | 2 | 2 |
| Yang H et al[2013]              | 1 | 2 | 2 | 1 | 2 | 0 | 2 | 0 | 0 | 1 | 1 | 1 | 2 | 0 | 1 | 1 | 0 | 0 | 2 | 2 |
| Moshaverina A et al [2014]      | 1 | 2 | 2 | 1 | 2 | 1 | 2 | 2 | 1 | 2 | 0 | 2 | 2 | 0 | 1 | 1 | 1 | 1 | 1 | 2 |

**Supplemental Table iii: In - Vitro studies graded with yes or no for risk bias assessment**

| Studies                       | Power calculation/Sample size calculation | Allocation concealment | Repetition/Randomization | Blinding in analysis |
|-------------------------------|-------------------------------------------|------------------------|--------------------------|----------------------|
| <b>SCAP</b>                   |                                           |                        |                          |                      |
| Abe s et al 2008              | No                                        | No                     | No                       | No                   |
| Park BW et al 2009            | No                                        | No                     | No                       | No                   |
| Abe S et al 2012              | No                                        | No                     | No                       | No                   |
| Wang S et al 2012             | No                                        | No                     | Yes                      | No                   |
| Wu J et al 2012               | No                                        | No                     | No                       | No                   |
| Wang L et al 2013             | No                                        | No                     | No                       | No                   |
| Qu B et al [2014]             | No                                        | No                     | No                       | No                   |
| <b>Dental Papilla</b>         |                                           |                        |                          |                      |
| Ikeda E et al [2006]          | No                                        | No                     | No                       | No                   |
| <b>Dental Follicle</b>        |                                           |                        |                          |                      |
| Tsuchiya S et al[2010]        | No                                        | No                     | No                       | No                   |
| Honda MJ et al 2011           | No                                        | No                     | No                       | No                   |
| Viale Bouroncle S et al[2011] | No                                        | No                     | No                       | No                   |
| Aonouma H et al[2012]         | No                                        | No                     | No                       | No                   |
| Li C et al[2012]              | No                                        | No                     | No                       | No                   |
| Park BW et al 2012            | No                                        | No                     | No                       | No                   |
| Mori g et al[2012]            | No                                        | No                     | No                       | No                   |
| Rezai Rad M et al[2013]       | No                                        | No                     | No                       | No                   |
| Takahashi K et al[2013]       | No                                        | No                     | No                       | No                   |
| Yao S et al[2013]             | No                                        | No                     | No                       | No                   |
| <b>Gingival</b>               |                                           |                        |                          |                      |
| Yu X et al[2013]              | No                                        | No                     | No                       | No                   |
| <b>Neural crest</b>           |                                           |                        |                          |                      |
| Degistrici o et al[2010]      | No                                        | No                     | No                       | No                   |
| <b>SHED</b>                   |                                           |                        |                          |                      |
| Miura M et al 2003            | No                                        | No                     | No                       | No                   |
| Vakhrusev IV et al[2010]      | No                                        | No                     | No                       | No                   |
| Li B et al 2012               | No                                        | No                     | No                       | No                   |
| Viale-Bouroncle S et al[2012] | No                                        | No                     | No                       | No                   |
| Vakhrusev IV et al[2013]      | No                                        | No                     | No                       | No                   |
| Karadzic L et al [2014]       | No                                        | No                     | No                       | No                   |
| Yu S et al[2014]              | No                                        | No                     | No                       | No                   |
| <b>Pulp</b>                   |                                           |                        |                          |                      |
| Gronthos 2000                 | No                                        | No                     | No                       | No                   |
| Laino G et al[2005]           | No                                        | No                     | No                       | No                   |
| Laino G et al[2006]           | No                                        | No                     | No                       | No                   |
| D'Aquino R et al [2007]       | No                                        | No                     | Yes                      | No                   |
| Cheng PH et al[2008]          | No                                        | No                     | No                       | No                   |
| Graziano A et al[2008]        | No                                        | No                     | No                       | No                   |
| Morito A et al 2009           | No                                        | No                     | Yes                      | No                   |
| Alge DL et al[2010]           | No                                        | No                     | No                       | No                   |
| Han MJ et al[2011]            | No                                        | No                     | No                       | No                   |
| Mangano C et al [2010]        | No                                        | No                     | No                       | No                   |
| Mori G et al[2010]            | No                                        | No                     | No                       | No                   |
| Riccio M et al [2010]         | No                                        | No                     | No                       | No                   |
| Spath I et al[2010]           | No                                        | No                     | No                       | No                   |
| Chan B et al [2011]           | No                                        | No                     | No                       | No                   |
| Galli D et al[2011]           | No                                        | No                     | No                       | No                   |
| Ida et al[2011]               | No                                        | No                     | No                       | No                   |
| Li JH et al[2011]             | No                                        | No                     | No                       | No                   |

|                                     |     |    |     |     |
|-------------------------------------|-----|----|-----|-----|
| <b>Mangano C et al[2011]</b>        | No  | No | No  | No  |
| <b>Struys T et al[2011]</b>         | No  | No | No  | Yes |
| <b>Huang XF et al[2012]</b>         | No  | No | No  | No  |
| <b>Huang Y et al[2012]</b>          | No  | No | No  | No  |
| <b>Khann-Jain R et al[2012]</b>     | No  | No | No  | No  |
| <b>Pisciotta A et al[2012]</b>      | No  | No | No  | No  |
| <b>Tasli PN et al[2013]</b>         | No  | No | No  | No  |
| <b>Annibali S et al 2013</b>        | No  | No | Yes | No  |
| <b>Palumbo C et al[2013]</b>        | No  | No | No  | No  |
| <b>Zavatti M et al[2013]</b>        | No  | No | No  | No  |
| <b>Akkouch A et al [2014]</b>       | No  | No | No  | No  |
| <b>Amir LR et al[2014]</b>          | No  | No | Yes | No  |
| <b>Guo T et al[2014]</b>            | No  | No | No  | No  |
| <b>Huang CE et al[2014]</b>         | No  | No | No  | No  |
| <b>Jensen J et al[2014]</b>         | No  | No | No  | No  |
| <b>Ji J et al[2014]</b>             | Yes | No | No  | No  |
| <b>Kanafi MM et al [2014]</b>       | No  | No | No  | No  |
| <b>Niu LN et al[2014]</b>           | No  | No | No  | No  |
| <b>Tasli PN et al[2014]</b>         | No  | No | No  | No  |
| <b>Woloszyk A et al [2014]</b>      | No  | No | No  | No  |
| <b>PDLSC</b>                        |     |    |     |     |
| <b>Gay IC et al[2007]</b>           | No  | No | Yes | No  |
| <b>Trubiani O et al[2007]</b>       | No  | No | No  | No  |
| <b>Zhou Y et al[ 2008]</b>          | No  | No | Yes | No  |
| <b>Orciani M et al[2009]</b>        | No  | No | No  | No  |
| <b>He H et al[2010]</b>             | No  | No | No  | No  |
| <b>Silverio KG et al [2010]</b>     | No  | No | No  | No  |
| <b>Zhang B et al 2011</b>           | No  | No | No  | No  |
| <b>Zhou Q et al[ 2011]</b>          | No  | No | No  | No  |
| <b>Ge S et al [2012]</b>            | No  | No | Yes | No  |
| <b>Lee JH et al [2012]</b>          | No  | No | No  | No  |
| <b>Sunnunliganon L et al[2012]</b>  | No  | No | No  | No  |
| <b>Yu Y et al[2012]</b>             | No  | No | Yes | No  |
| <b>Zhang C et al [2012]</b>         | No  | No | Yes | No  |
| <b>Gao LN et al [2013]</b>          | No  | No | No  | No  |
| <b>Ge S et al[2013]</b>             | No  | No | No  | No  |
| <b>Houshmand B et al[2013]</b>      | No  | No | No  | No  |
| <b>Kato H et al [2013]</b>          | No  | No | No  | No  |
| <b>Kim SY et al[2013]</b>           | No  | No | No  | No  |
| <b>Kong X et al [2013]</b>          | No  | No | No  | No  |
| <b>Singhatanadgit W et al[2013]</b> | No  | No | No  | No  |
| <b>Yu S et al[2013]</b>             | No  | No | No  | No  |
| <b>Hakki SS et al[2014]</b>         | No  | No | No  | No  |
| <b>Jung IH et al[2014]</b>          | No  | No | No  | No  |
| <b>Tang R et al[2014]</b>           | No  | No | No  | No  |
| <b>Ye G et al[2014]</b>             | No  | No | No  | No  |
| <b>Multiple Stem Cells</b>          |     |    |     |     |
| <b>Koyama N et al[2009]</b>         | No  | No | Yes | No  |
| <b>Chadipiralla K et al[2010]</b>   | No  | No | Yes | No  |
| <b>Bakopoulou A[2011]</b>           | No  | No | Yes | No  |
| <b>Lee UL et al[2011]</b>           | No  | No | Yes | No  |
| <b>Atari M et al[2012]</b>          | No  | No | Yes | No  |
| <b>Moshaverinia A et al[2012]</b>   | No  | No | No  | No  |
| <b>Yang H et al[2010]</b>           | No  | No | No  | No  |
| <b>Davies OG et al [2014]</b>       | No  | No | Yes | No  |
| <b>Moshaverina A et al[2014]</b>    | No  | No | Yes | No  |

Supplemental table –iv: In vivo studies graded with yes or no for risk bias assessment

| Studies                         |                                                  |                        |                              |                      |
|---------------------------------|--------------------------------------------------|------------------------|------------------------------|----------------------|
| SCAP                            | Power calculation/<br>Sample size<br>calculation | Allocation concealment | Repetition/<br>Randomization | Blinding in analysis |
| Abe S et al [2008]              | No                                               | No                     | No                           | No                   |
| Abe s et al[2012]               | No                                               | No                     | No                           | No                   |
| Wang L et al [2013]             | No                                               | No                     | No                           | No                   |
| Qu B et al 2014                 | No                                               | No                     | Yes                          | No                   |
| Dental Follicular               |                                                  |                        |                              |                      |
| Xu LL et al[2009]               | No                                               | No                     | No                           | No                   |
| Tsuchiya S et al[2010]          | No                                               | No                     | No                           | No                   |
| Honda MJ et al[2011]            | No                                               | No                     | No                           | No                   |
| Park BW et al [2012]            | No                                               | No                     | No                           | No                   |
| Gingival                        |                                                  |                        |                              |                      |
| Wang F et al[2011]              | No                                               | No                     | Yes                          | No                   |
| Yu X et al[2013]                | No                                               | No                     | Yes                          | No                   |
| Xu QC et al[2014]               | No                                               | No                     | Yes                          | No                   |
| SHED                            |                                                  |                        |                              |                      |
| Miura M et al 2003              | No                                               | No                     | No                           | No                   |
| Seo BB et al[2008]              | No                                               | No                     | No                           | No                   |
| Zheng Y et al [2009]            | No                                               | No                     | No                           | No                   |
| Li B et al[2012]                | No                                               | No                     | No                           | No                   |
| Vakhrusev IV et al[2012]        | No                                               | No                     | No                           | No                   |
| Alkai A et al[2013]             | No                                               | No                     | No                           | No                   |
| Behina et al A [2014]           | No                                               | No                     | Yes                          | No                   |
| Pulp                            |                                                  |                        |                              |                      |
| Laino G et al 2006              | No                                               | No                     | No                           | No                   |
| Otaki S et al[2007]             | No                                               | No                     | No                           | No                   |
| De Mendonca costa A et al[2008] | No                                               | No                     | No                           | No                   |
| Zhang W et al[2008]             | No                                               | No                     | No                           | No                   |
| Morito A et al [2009]           | No                                               | No                     | No                           | No                   |
| Yang x ET AL[2009]              | No                                               | No                     | No                           | No                   |
| Kraft DCE et al[2010]           | No                                               | No                     | No                           | Yes                  |
| Chan B et al[2011]              | No                                               | No                     | No                           | No                   |
| Ito K et al[2011]               | No                                               | No                     | No                           | No                   |
| Li JH et al[2011]               | No                                               | No                     | No                           | No                   |
| Liu HCE et al[2011]             | No                                               | No                     | No                           | No                   |
| Pisciotta A et al[2012]         | No                                               | No                     | No                           | No                   |
| Riccio M et al[2012]            | No                                               | No                     | No                           | No                   |
| Annibali S et al 2013           | No                                               | No                     | No                           | No                   |
| Khorsand A et al[2013]          | Yes                                              | No                     | Yes                          | No                   |

|                                                     |     |    |     |     |
|-----------------------------------------------------|-----|----|-----|-----|
| <b>Maraldi T et al [2013]</b>                       | No  | No | No  | No  |
| <b>Wang Y et al [2013]</b><br><b>Estrogen Study</b> | No  | No | No  | No  |
| <b>Annibali S et al[2014]</b>                       | No  | No | No  | No  |
| <b>Ling LE et al[2014]</b>                          | No  | No | No  | No  |
| <b>Niu LN et al [2014]</b>                          | No  | No | No  | No  |
| <b>PDLSC</b>                                        |     |    |     |     |
| <b>Dogan A et al[2002]</b>                          | No  | No | Yes | No  |
| <b>Seo BM et al[2004]</b>                           | No  | No | Yes | No  |
| <b>Murano et al[2006]</b>                           | No  | No | No  | No  |
| <b>Iwata T et al[2009]</b>                          | No  | No | No  | No  |
| <b>Kim SH et al[2009]</b>                           | No  | No | No  | No  |
| <b>Ding G et al [2010]</b>                          | No  | No | Yes | No  |
| <b>He H et al[2010]</b>                             | No  | No | No  | No  |
| <b>Grimm WD et al[ 2011]</b>                        | No  | No | No  | No  |
| <b>Lee JH et al[2012]</b>                           | No  | No | No  | No  |
| <b>Suaidd FF et al [2012]</b>                       | No  | No | Yes | Yes |
| <b>Tour G et al[2012]</b>                           | No  | No | Yes | No  |
| <b>Yu Y et al[2012]</b>                             | No  | No | No  | No  |
| <b>Gao LN et al[2013]</b>                           | No  | No | No  | No  |
| <b>Ge S et al[2013]</b>                             | No  | No | Yes | No  |
| <b>Mrozik et al [2013]</b>                          | No  | No | Yes | Yes |
| <b>Yu N et al[2013]</b>                             | No  | No | Yes | No  |
| <b>Han j et al[2014]</b>                            | No  | No | No  | No  |
| <b>Jung IH et al[2014]</b>                          | No  | No | Yes | No  |
| <b>Park SY et al[2014]</b>                          | No  | No | No  | No  |
| <b>Yu BH et al[2014]</b>                            | No  | No | Yes | No  |
| <b>Yu BH et al[2014]</b>                            | No  | No | Yes | No  |
| <b>Zhao BJ [2014]</b>                               | No  | No | No  | No  |
| <b>Multiple</b>                                     |     |    |     |     |
| <b>Yamada Y et al[2011]</b>                         | No  | No | Yes | No  |
| <b>Wang X et al[2012]</b>                           | No  | No | No  | No  |
| <b>Moshaverina A et al[2013]</b>                    | No  | No | No  | No  |
| <b>Yang H et al[2013]</b>                           | No  | No | No  | No  |
| <b>Moshaverina A et al [2014]</b>                   | Yes | No | No  | No  |
